# Supplementary material for: Binding Characteristics of Sphingosine-1-Phosphate to ApoM hints to Assisted Release Mechanism via the ApoM Calyx-Opening
Source: PubMed Central journal article supplement (PMC4967915; doi:10.1038/srep30655), 2016-08-01
Supplement: srep30655-s1.pdf [file srep30655-s1.pdf]

# Supplementary Information: Binding Characteristics of Sphingosine-1-Phosphate to ApoM hints to Assisted Release Mechanism via the ApoM Calyx-Opening

Hansi Zhang<sup>1</sup>, Kristyna Pluhackova<sup>1</sup>, Zhenyan Jiang<sup>1</sup>, and Rainer A. Böckmann<sup>1,\*</sup>

<sup>1</sup>Computational Biology, Department of Biology, Friedrich-Alexander Universität Erlangen-Nürnberg, Erlangen, 91058, Germany

\*rainer.boeckmann@fau.de

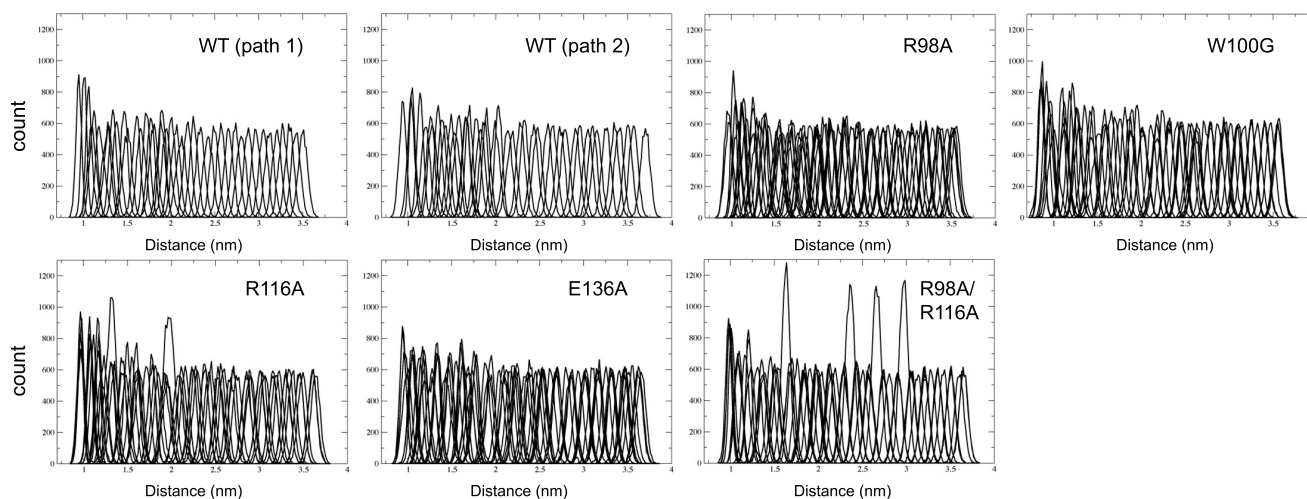

**Figure S1.** The histograms of umbrella sampling for the wild type and for the mutants.

**Table S1.** The volumes of the apoM binding pocket. The cavity volumes were computed with the program “Pocket Volume MEasurer” (POVME)<sup>1</sup>.

| System                    | Upper part (Å <sup>3</sup> ) | Lower part (Å <sup>3</sup> ) |
|---------------------------|------------------------------|------------------------------|
| S1P-bound apoM            | 285                          | 145                          |
| apoM after S1P deletion   | 456                          | 0                            |
| apoM after S1P pulled out | 452                          | 0                            |

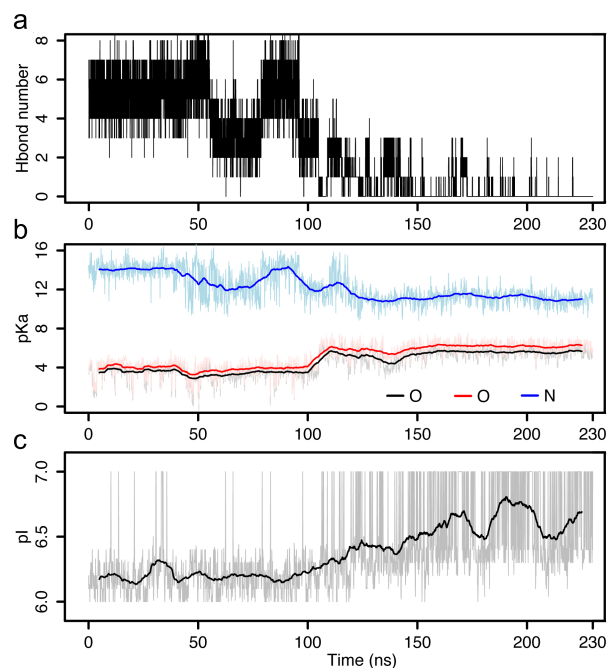

**Figure S2.** The evolution of the numbers of hydrogen bonds between S1P and apoM along the unbinding simulation (a).  $pK_a$  values of S1P (b), oxygen atoms from the phosphate moiety are shown in black and red, and nitrogen atom from the amino group in blue. The change of the isoelectric point (pI) of apoM during the pulling process is shown in (c).

| Atom name | Atom type | Charge | Atom name | Atom type | Charge |
|-----------|-----------|--------|-----------|-----------|--------|
| O12       | O2L       | -0.951 | C27       | CTL2      | 0      |
| P         | PL        | 1.38   | H7S       | HAL2      | 0      |
| O13       | O2L       | -0.951 | H7R       | HAL2      | 0      |
| O14       | O2L       | -0.951 | C28       | CTL2      | 0      |
| O11       | OSLP      | -0.622 | H8S       | HAL2      | 0      |
| C1        | CTL2      | 0.34   | H8R       | HAL2      | 0      |
| HA        | HAL2      | -0.12  | C29       | CTL2      | 0      |
| HB        | HAL2      | -0.12  | H9S       | HAL2      | 0      |
| C2        | CTL2      | 0.405  | H9R       | HAL2      | 0      |
| HS        | HAL2      | 0.09   | C210      | CTL2      | 0      |
| N1        | NH3L      | -0.29  | H10S      | HAL2      | 0      |
| H1        | HCL       | 0.31   | H10R      | HAL2      | 0      |
| H2        | HCL       | 0.31   | C211      | CTL2      | 0      |
| H3        | HCL       | 0.31   | H11S      | HAL2      | 0      |
| C21       | CTL2      | 0.03   | H11R      | HAL2      | 0      |
| H21       | HAL2      | 0.13   | C212      | CTL2      | 0      |
| OH1       | OHL       | -0.74  | H12S      | HAL2      | 0      |
| HO1       | HOL       | 0.47   | H12R      | HAL2      | 0      |
| C22       | CET1      | -0.28  | C213      | CTL2      | 0      |
| H22       | HEL1      | 0.12   | H13S      | HAL2      | 0      |
| C23       | CET1      | -0.09  | H13R      | HAL2      | 0      |
| H23       | HEL1      | 0.1    | C214      | CTL2      | 0      |
| C24       | CTL2      | 0.04   | H14S      | HAL2      | 0      |
| H4S       | HAL2      | 0.04   | H14R      | HAL2      | 0      |
| H4R       | HAL2      | 0.04   | C215      | CTL2      | 0.047  |
| C25       | CTL2      | 0      | H15S      | HAL2      | -0.007 |
| H5S       | HAL2      | 0      | H15R      | HAL2      | -0.007 |
| H5R       | HAL2      | 0      | C216      | CTL3      | -0.081 |
| C26       | CTL2      | 0      | H16S      | HAL3      | 0.016  |
| H6S       | HAL2      | 0      | H16R      | HAL3      | 0.016  |
| H6R       | HAL2      | 0      | H16T      | HAL3      | 0.016  |

**Table S2.** Simulation parameters for S1P molecule based on Slipids parameters.

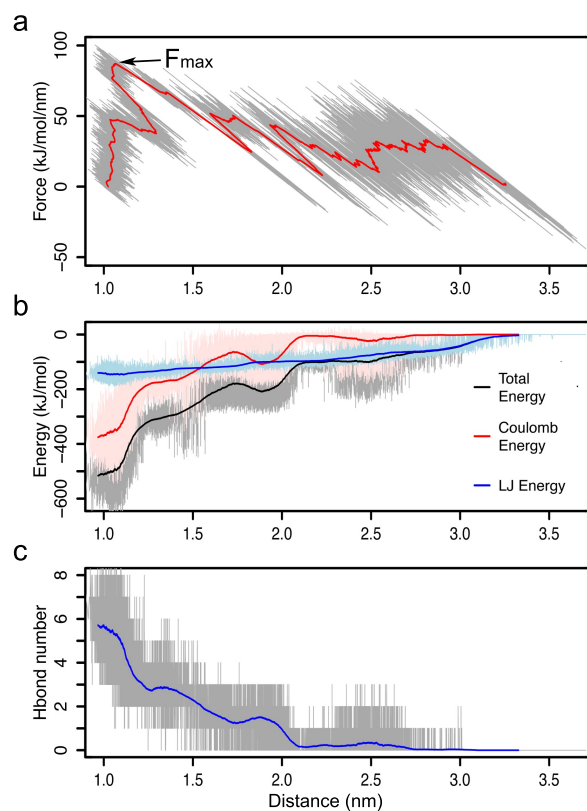

**Figure S3. Enforced unbinding of S1P from WT apoM.** Profiles of the applied pulling force (a), the S1P-apoM interaction energy (b), consisting of short range Lennard-Jones and Coulomb interactions, and the number of intermolecular hydrogen bonds (c) are given as a function of the distance between the S1P phosphorus atom and the COM of apoM. The smooth solid lines are moving averages of the original data.

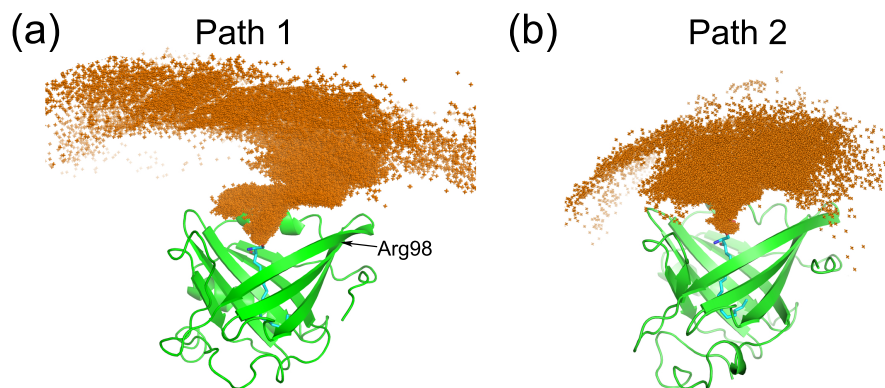

**Figure S4. Unbinding positions of S1P.** Overlay of the phosphorus atom positions (orange dots) of S1P from the umbrella samplings along path 1 (A) and path 2 (B), respectively. The apoM structure is shown in cartoon representation.

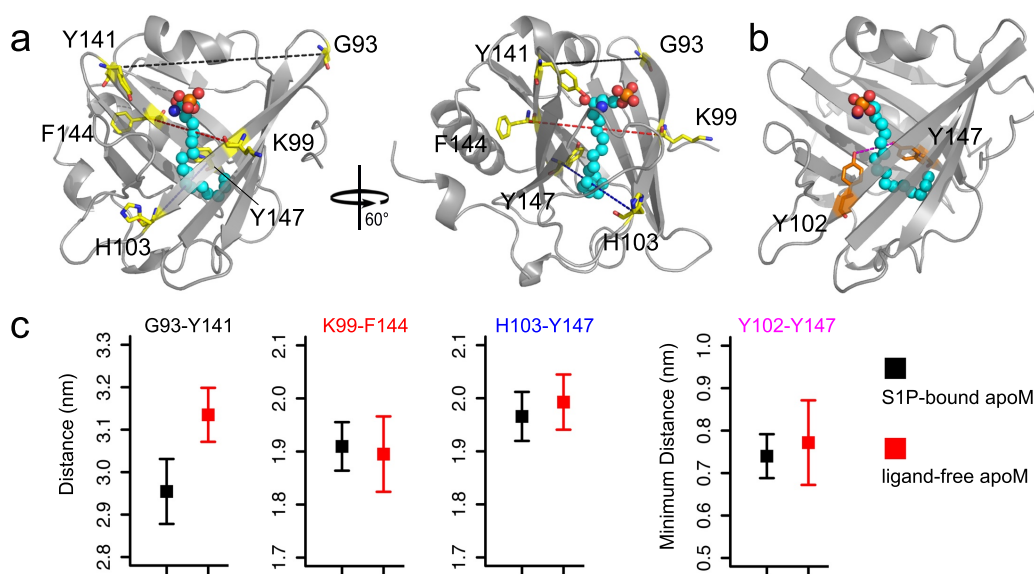

**Figure S5. Structure comparison of ligand-free and S1P-bound apoM.** (a) The three colored lines in black, red, and blue represent the distances of the opening, middle, and bottom parts of apoM, respectively. (b) The pink line shows the minimum distance between residues Tyr102 and Tyr147. (c) The average values and deviations of the distances between C $\alpha$  atoms of G93-Y141, K99-F144, H103-Y147, and the minimum distance between Y102 and Y147 from the S1P-bound apoM MD simulation (black) and the ligand-free apoM equilibration simulation (red) were analyzed.

## References

1. Durrant, J. D., de Oliveira, C. A. F. & McCammon, J. A. POVME: An algorithm for measuring binding-pocket volumes. *J. Mol. Graph. Model* **29**, 773–776 (2011).
